# Supplementary material
Source: HighWire-hosted journal article supplement (https://bjsm.bmj.com/content/54/6/341)

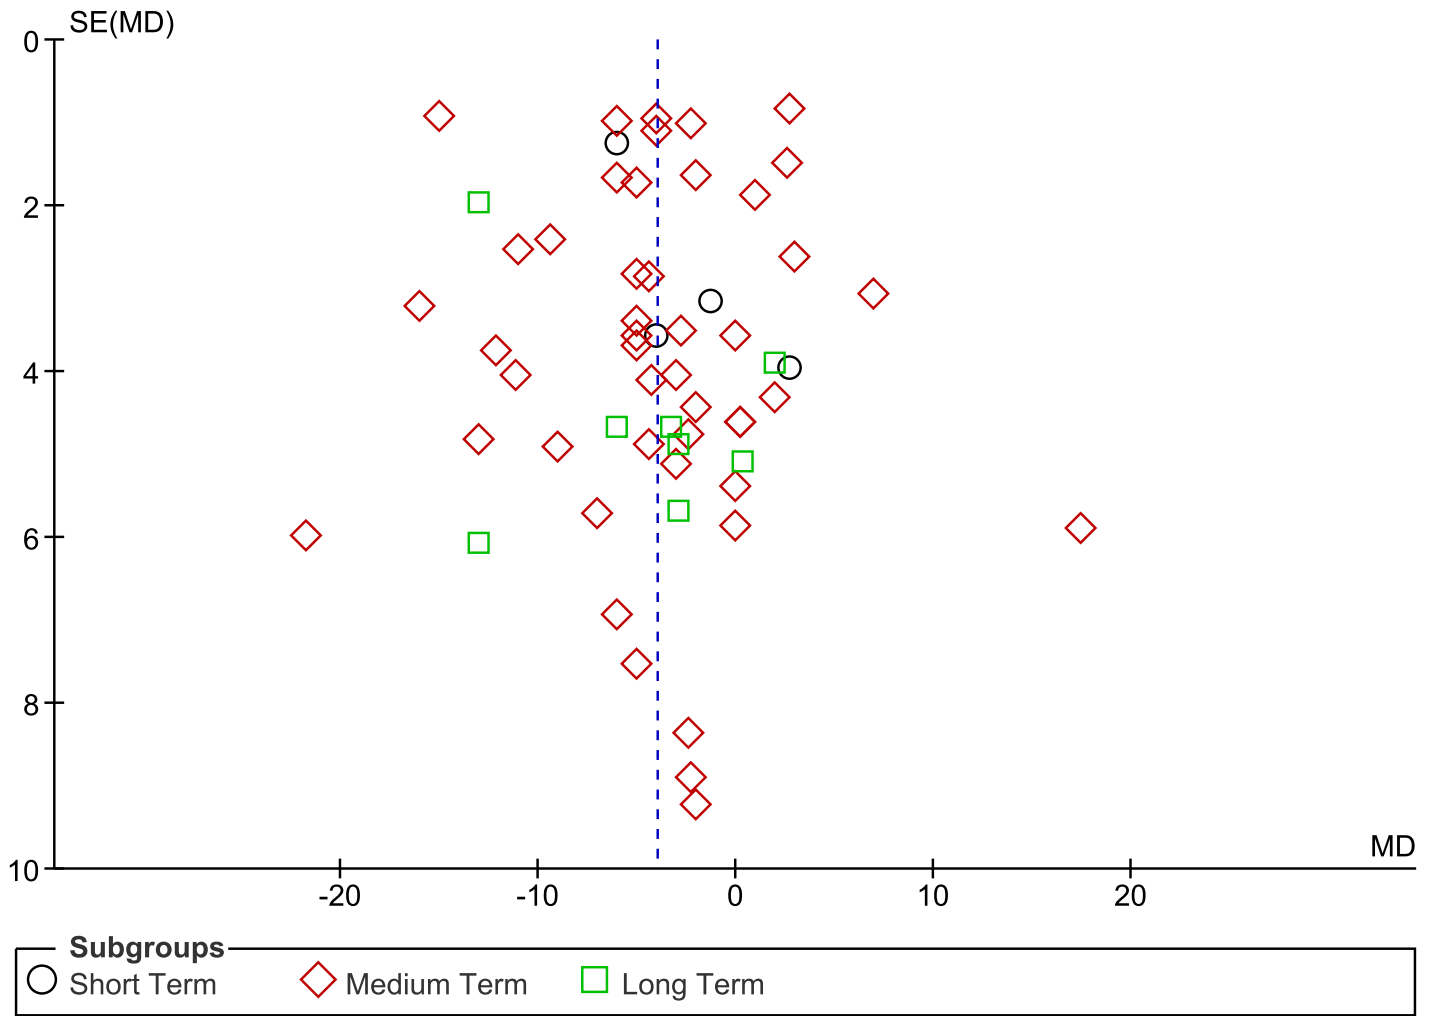

**Fig 1.** Funnel plot of studies reporting systolic blood pressure.

Supplement: inline-supplementary-material-10 [file inline-supplementary-material-10.pdf]

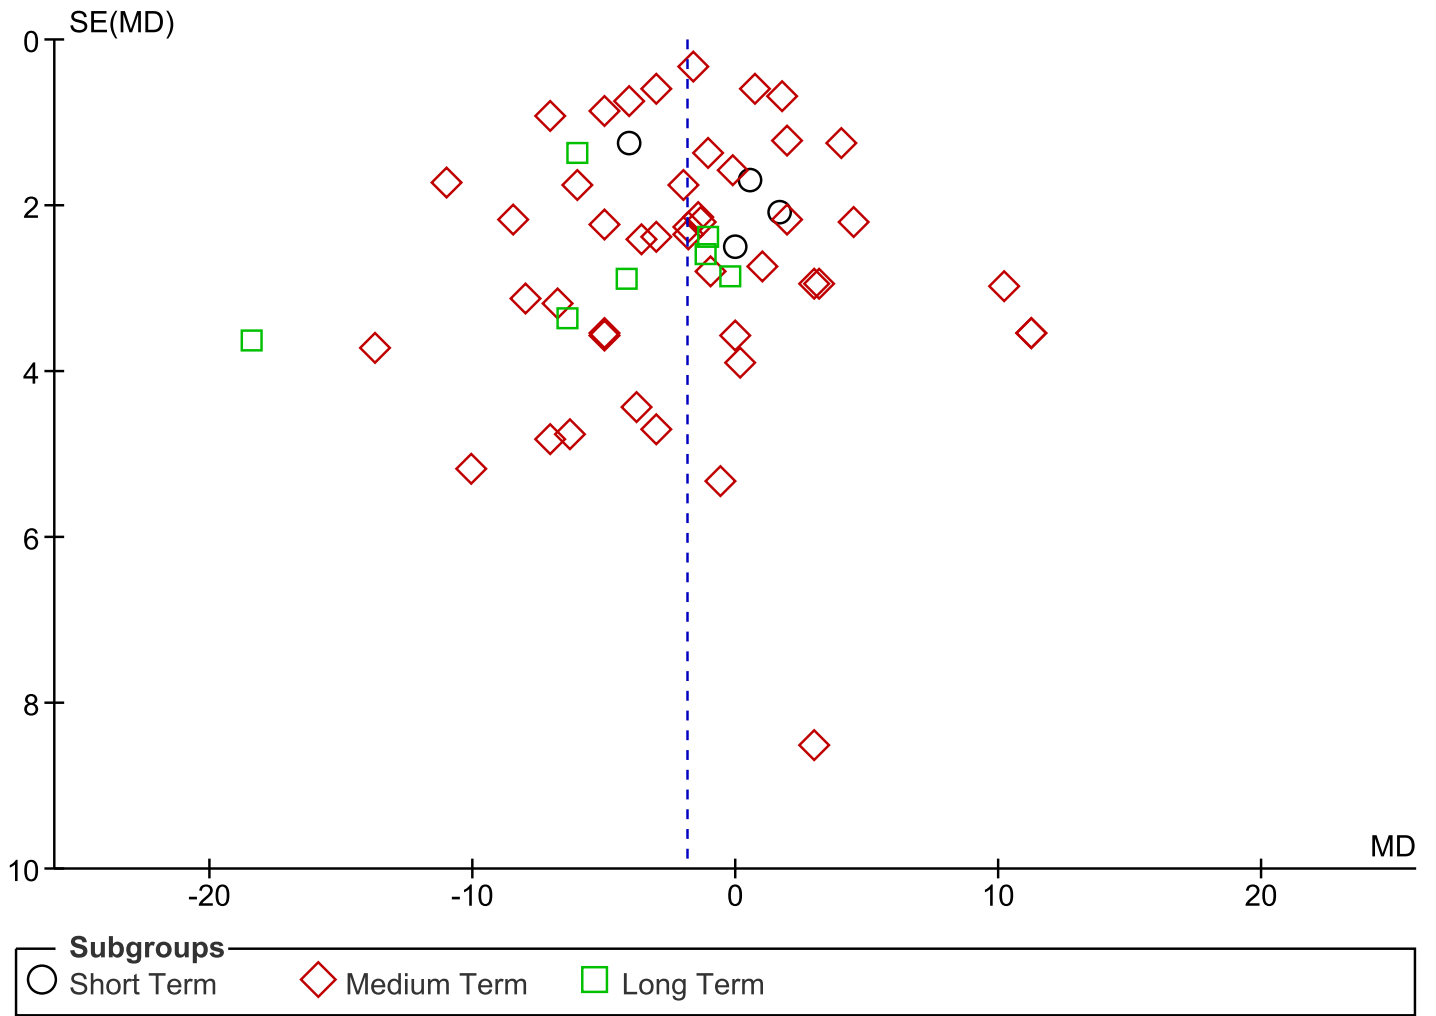

**Fig 2.** Funnel plot of studies reporting diastolic blood pressure.

Supplement: inline-supplementary-material-11 [file inline-supplementary-material-11.pdf]

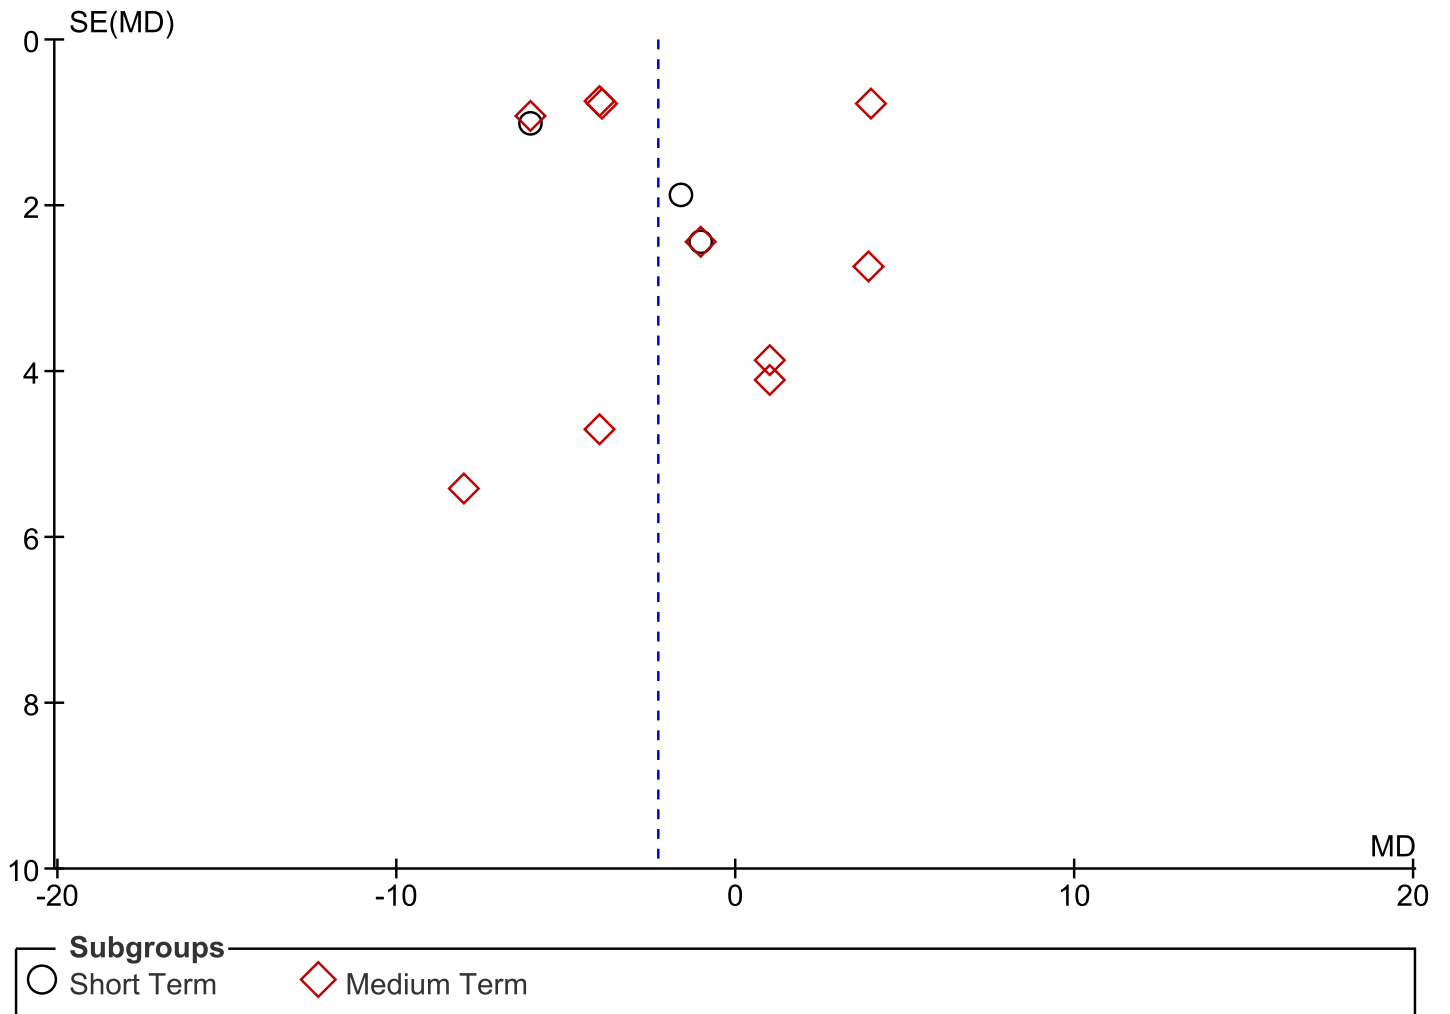

**Fig 3.** Funnel plot of studies reporting mean arterial pressure.

Supplement: inline-supplementary-material-12 [file inline-supplementary-material-12.pdf]

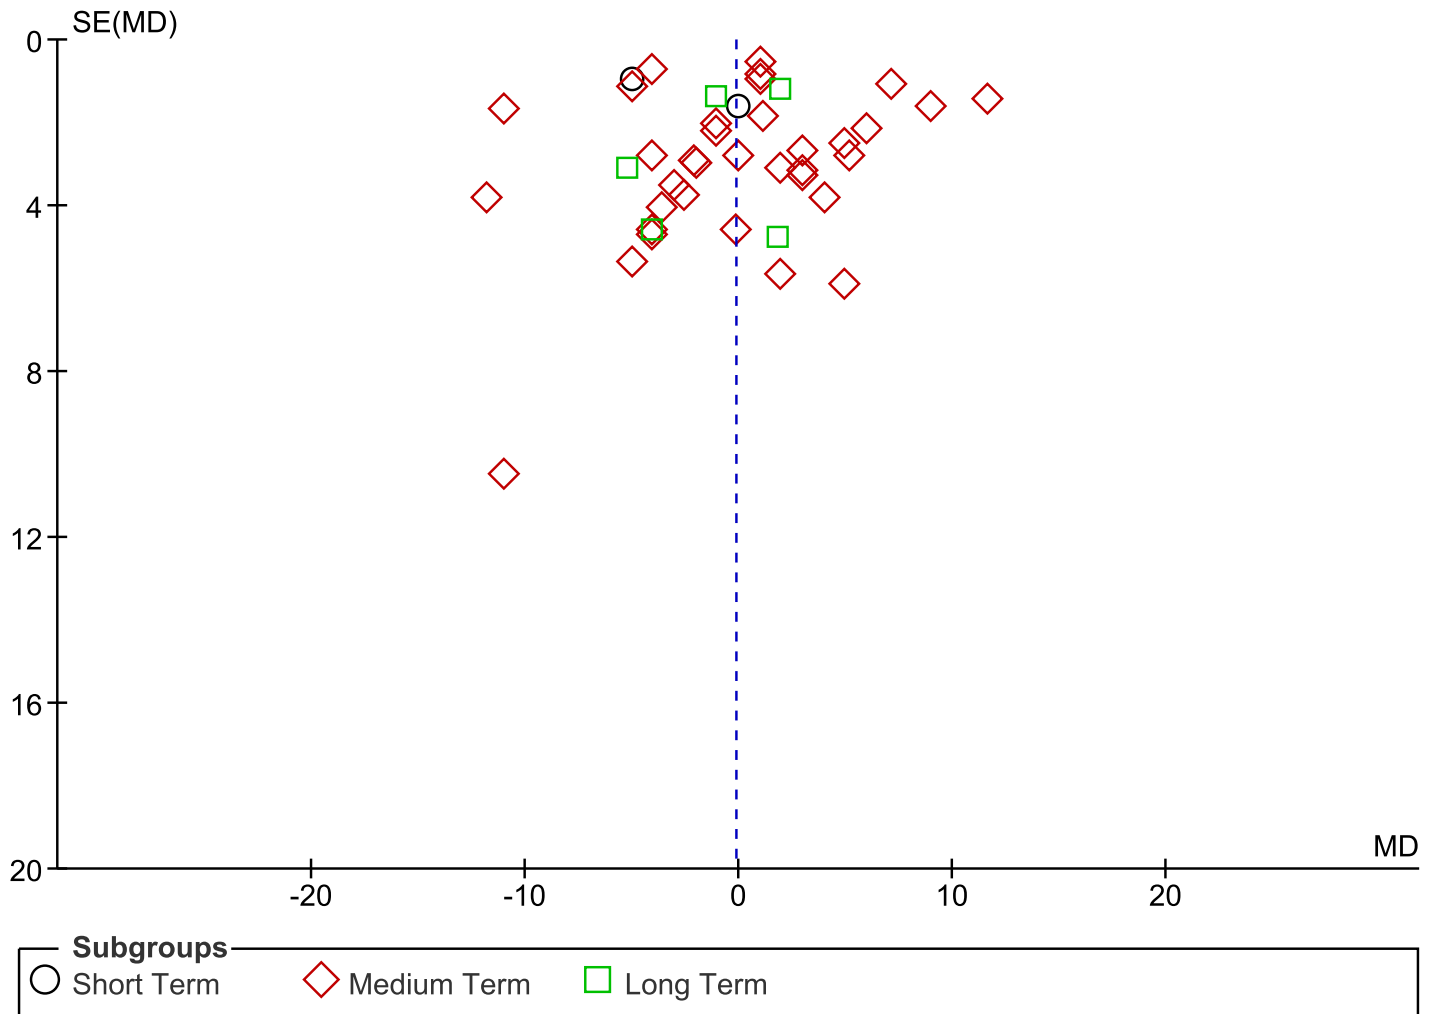

**Fig 4.** Funnel plot of studies reporting resting heart rate.

Supplement: inline-supplementary-material-13 [file inline-supplementary-material-13.pdf]

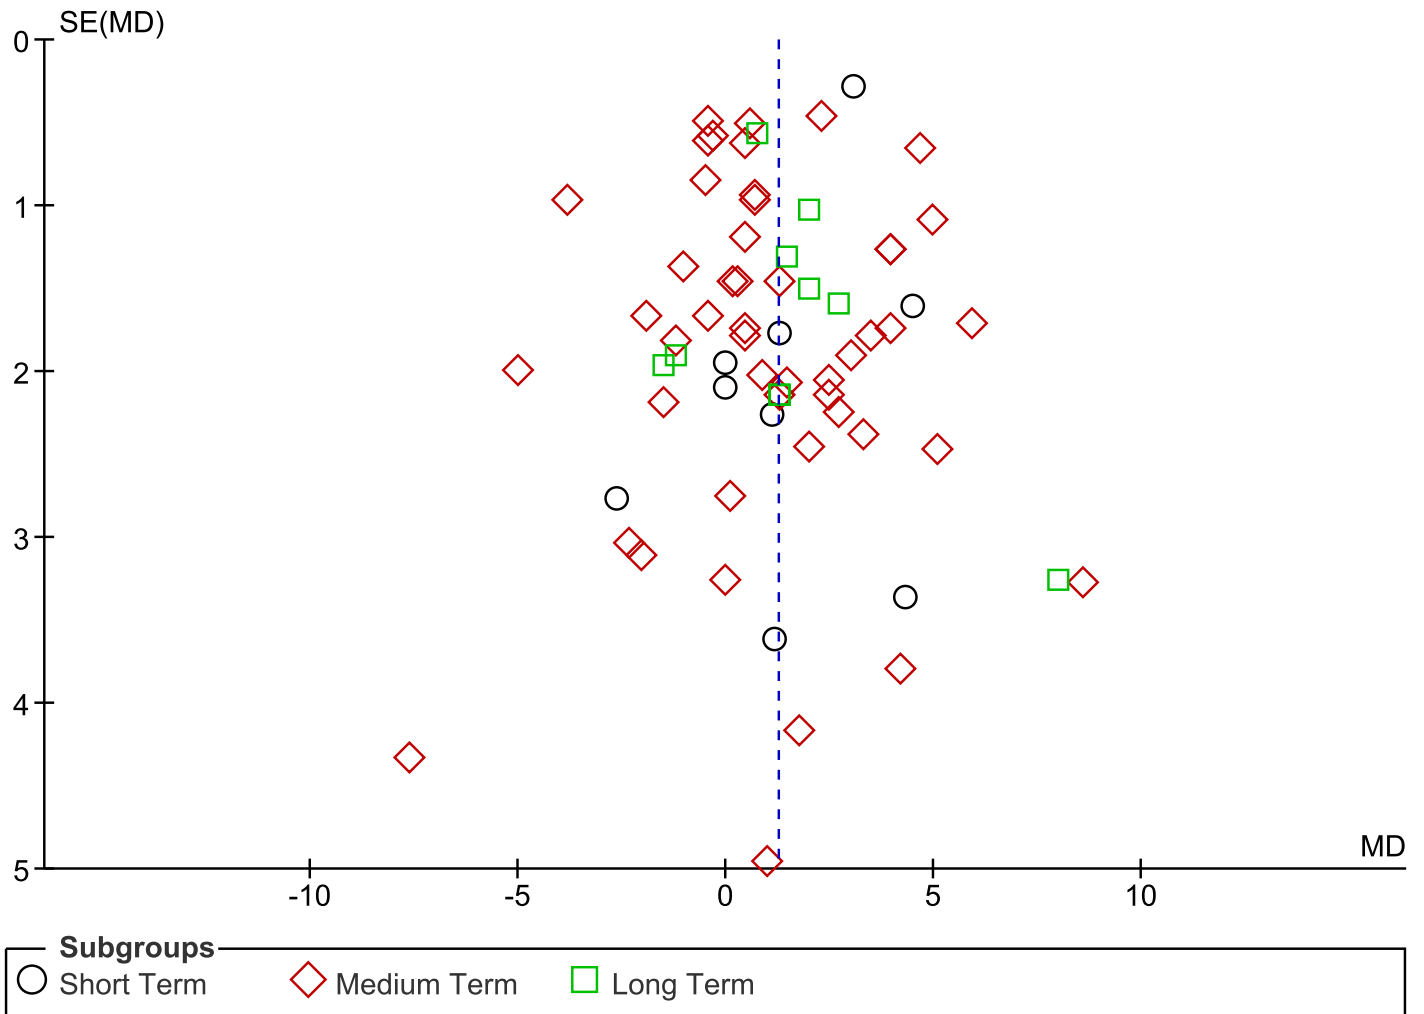

**Fig 5.** Funnel plot of studies reporting  $\dot{V}O_2\text{max}$ .

Supplement: inline-supplementary-material-14 [file inline-supplementary-material-14.pdf]

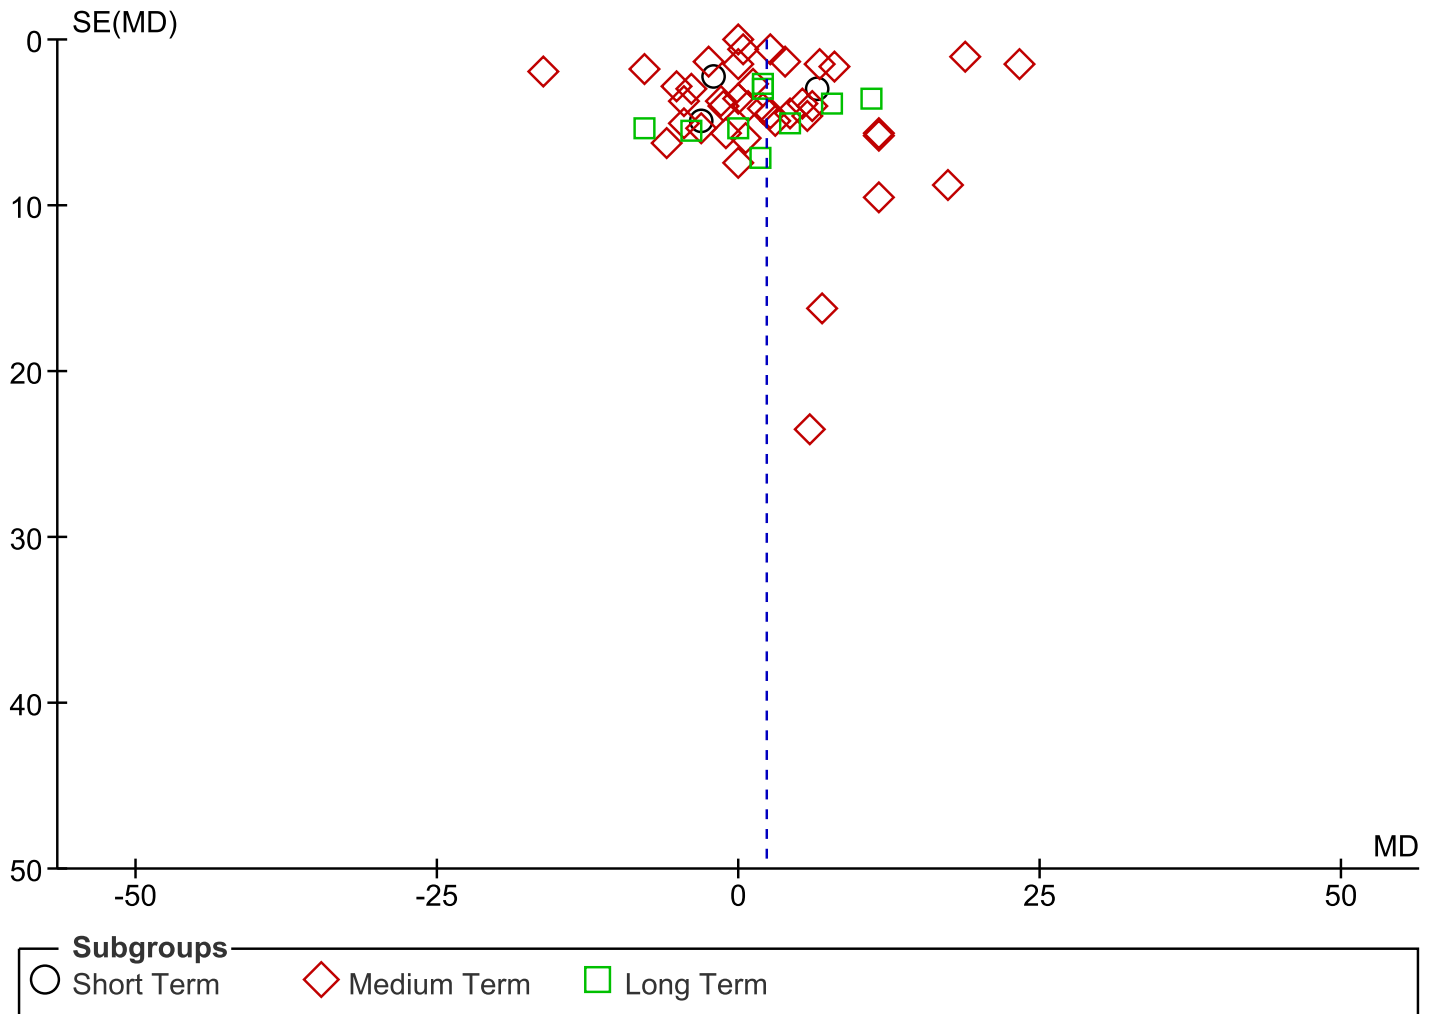

**Fig 7.** Funnel plot of studies reporting high density lipoprotein cholesterol levels.

Supplement: inline-supplementary-material-16 [file inline-supplementary-material-16.pdf]

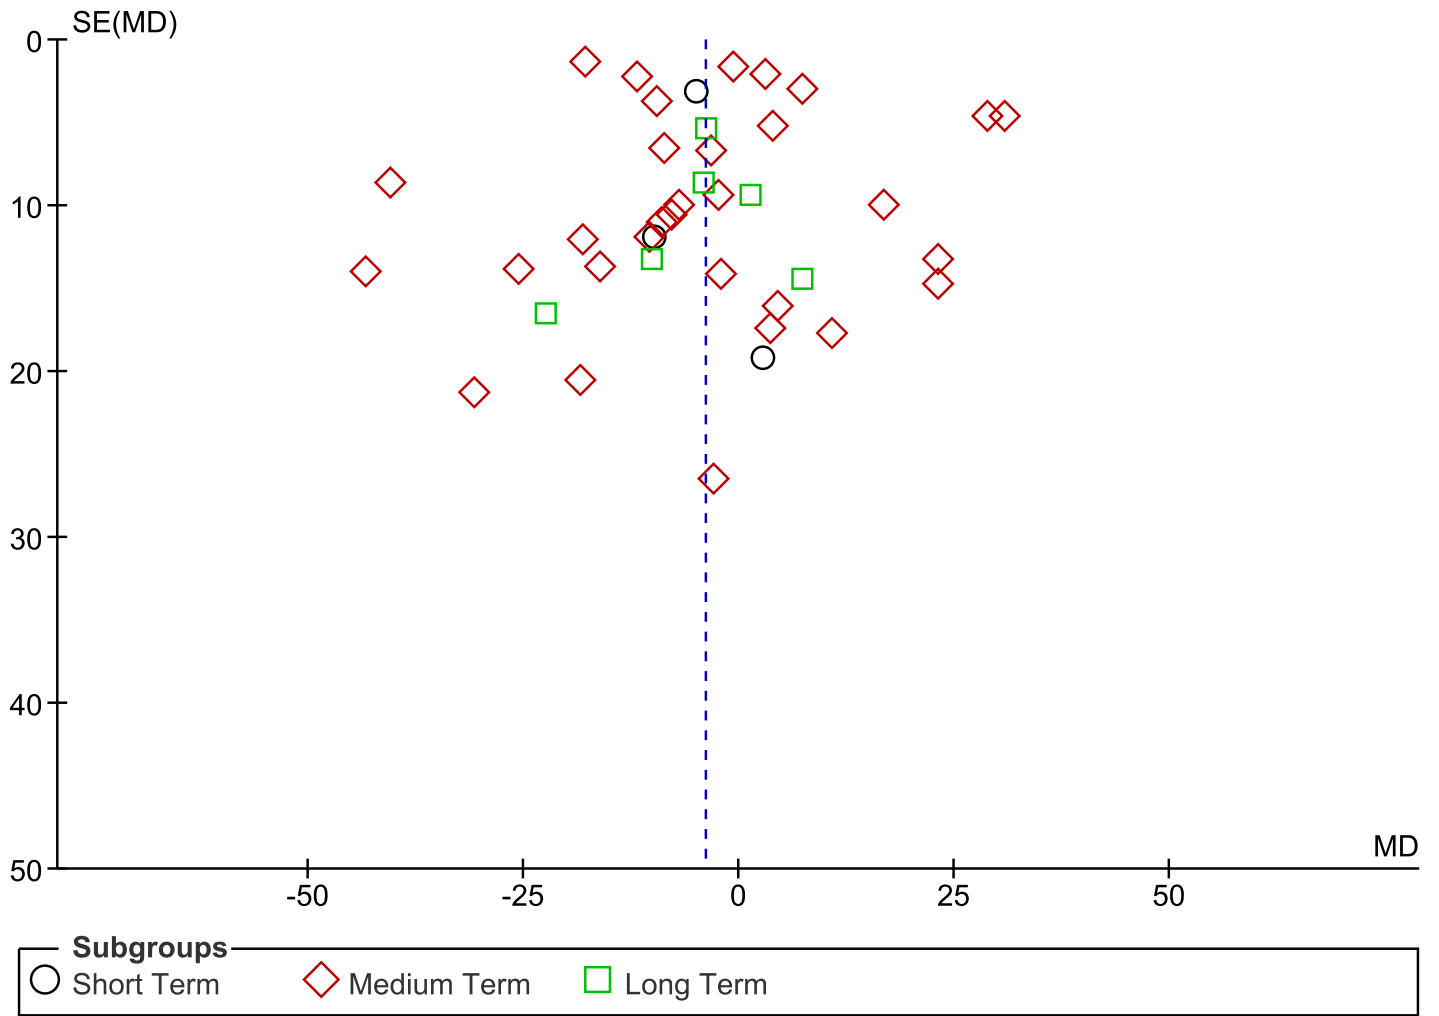

**Fig 8.** Funnel plot of studies reporting low density lipoprotein cholesterol levels.

Supplement: inline-supplementary-material-17 [file inline-supplementary-material-17.pdf]

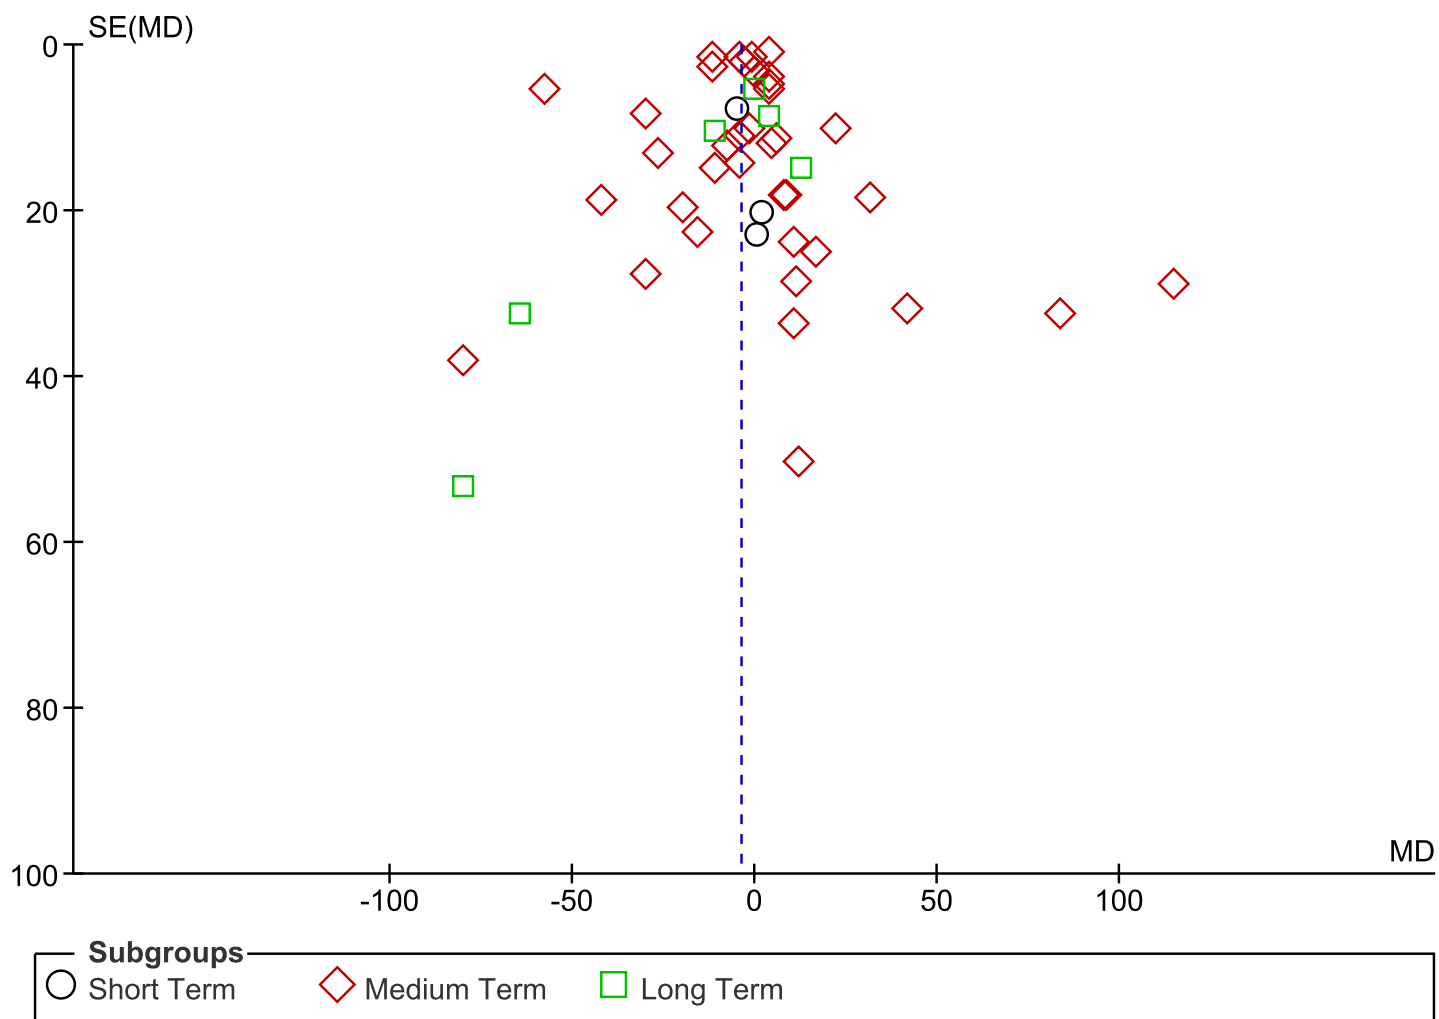

**Fig 9.** Funnel plot of studies reporting triglyceride levels.

Supplement: inline-supplementary-material-18 [file inline-supplementary-material-18.pdf]

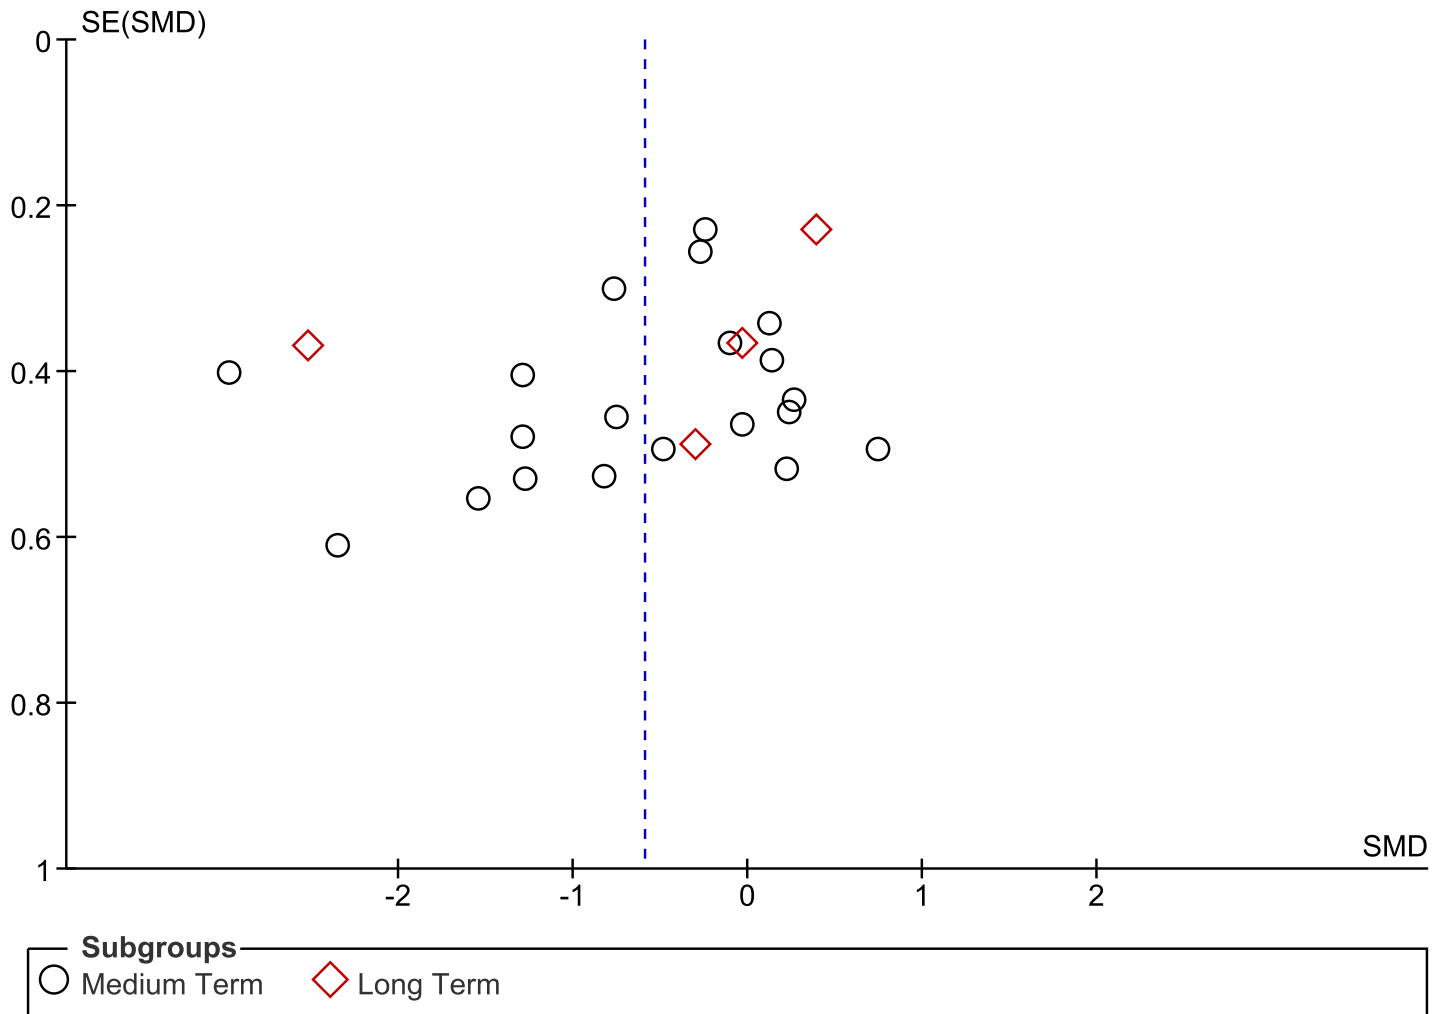

**Fig 10.** Funnel plot of studies reporting fasted insulin levels.

Supplement: inline-supplementary-material-19 [file inline-supplementary-material-19.pdf]

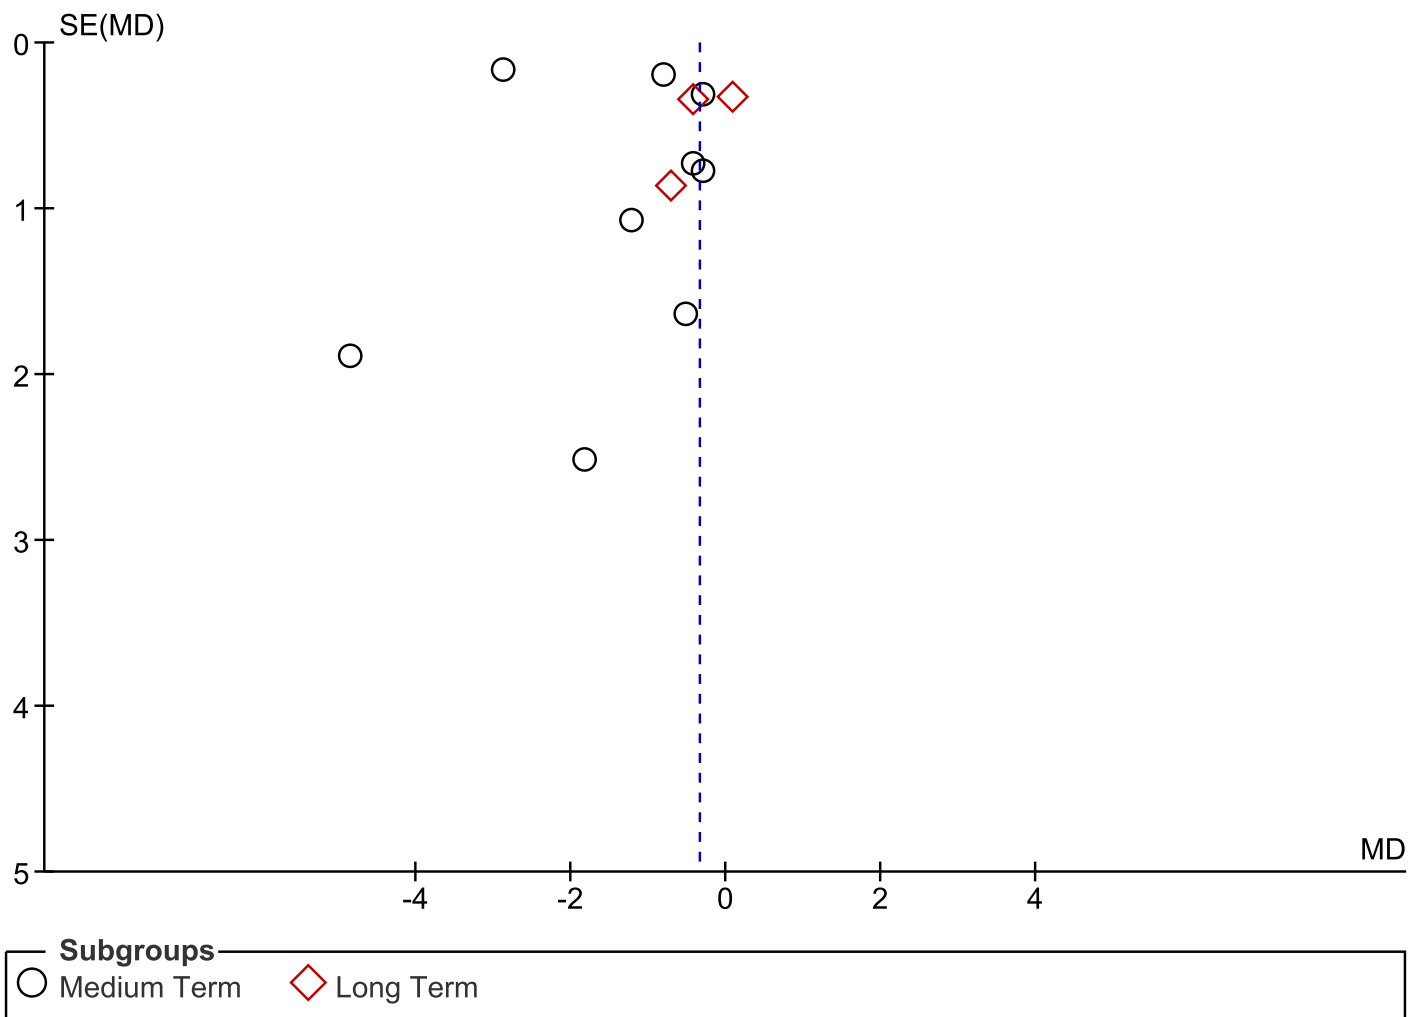

**Fig 11.** Funnel plot of studies reporting insulin resistance (HOMA-IR).

Supplement: inline-supplementary-material-20 [file inline-supplementary-material-20.pdf]

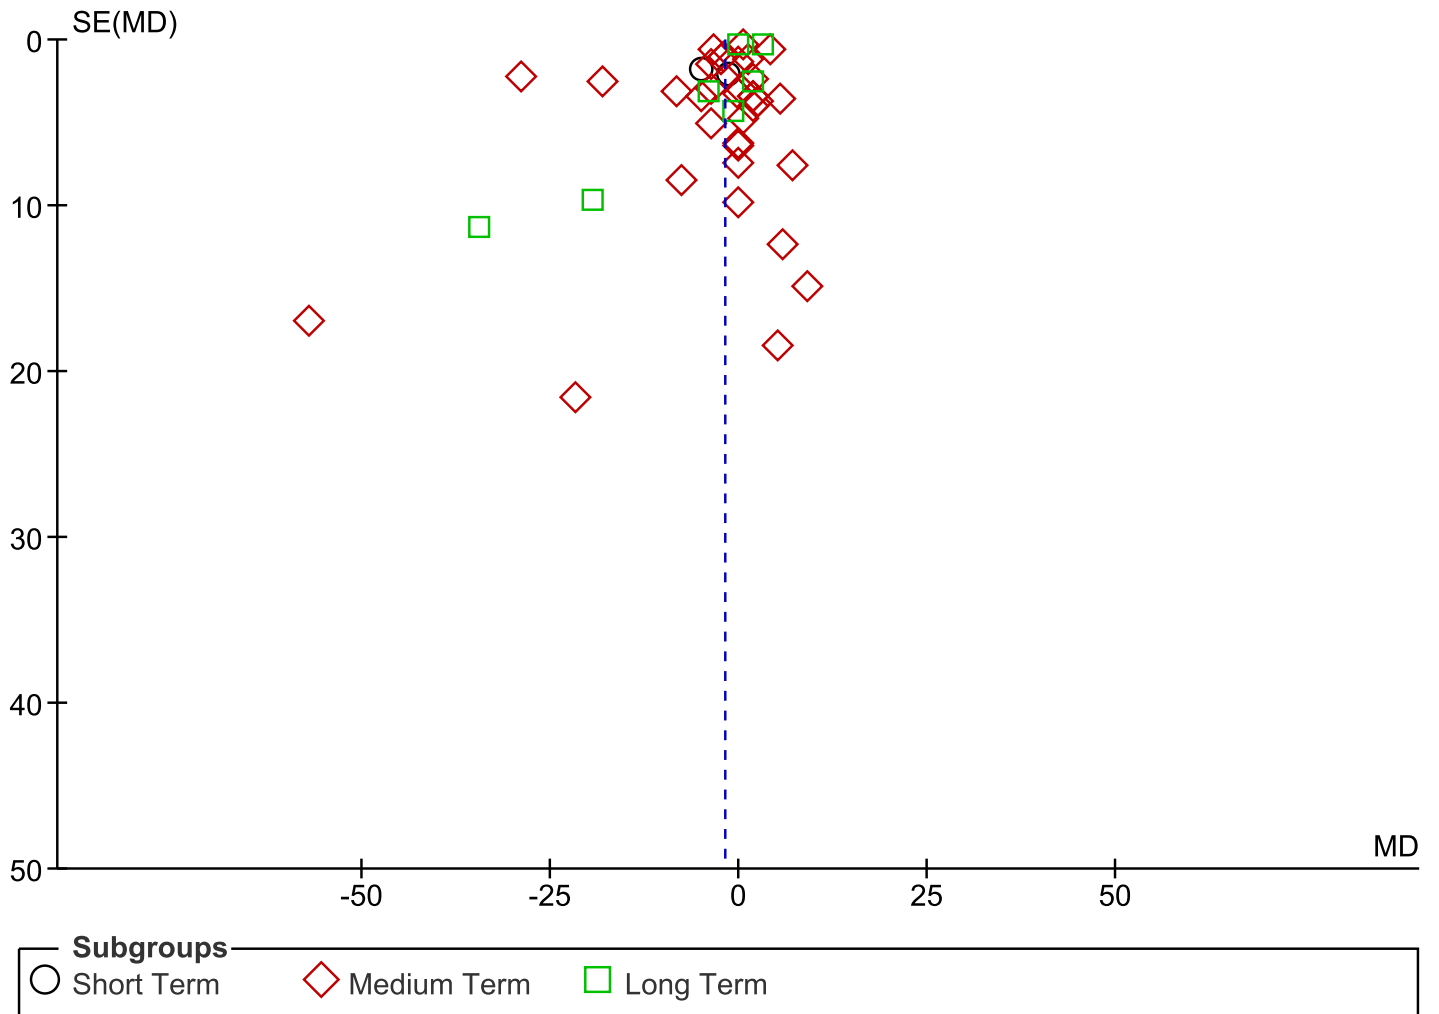

**Fig 12.** Funnel plot of studies reporting fasted glucose levels.

Supplement: inline-supplementary-material-21 [file inline-supplementary-material-21.pdf]

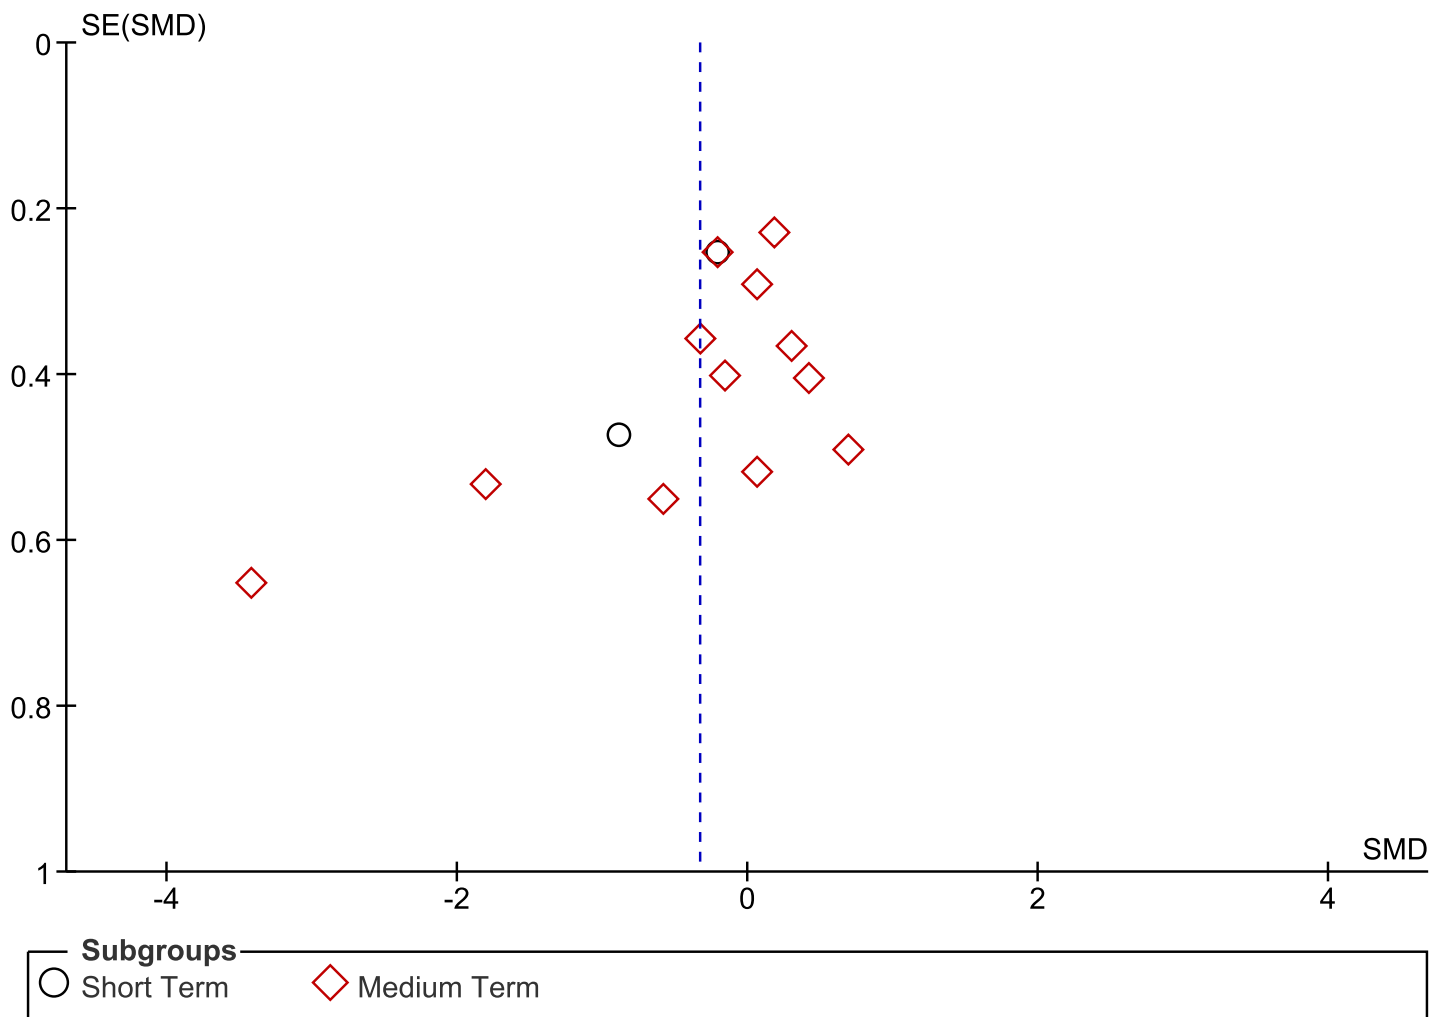

**Fig 13.** Funnel plot of studies reporting c-reactive protein levels.

Supplement: inline-supplementary-material-22 [file inline-supplementary-material-22.pdf]
